# Supplementary material
Source: MDPI journal article supplement (https://www.mdpi.com/2073-445X/12/6/1174)
Supplement: s1 [file s1]

**Supplementary material S2.** Stakeholder interview questions divided into 11 thematic categories 1A-11B on Atlantic Salmon fishing in northern Finland 2021-2022

| Question Nr. | Theme                               | Questions for all interviewees                                                                                                        | Questions only for local communities and tourism entrepreneurs                              |
|--------------|-------------------------------------|---------------------------------------------------------------------------------------------------------------------------------------|---------------------------------------------------------------------------------------------|
| 1A           | Residence                           |                                                                                                                                       | Do you reside in the area? If yes, how long have you been residing in the area?             |
| 1B/1C        | Work/relationship to salmon fishing | What do you do for work, or how is your work related to salmon fishing?                                                               | What else do you do for a living apart from salmon fishing/salmon fishing related business? |
| 1D           | Relevance of fishing, values        | How relevant do you think fishing is locally/for Finland/globally?                                                                    |                                                                                             |
| 2A           | Relationship with other livelihoods | How do you see fishing in the area in relation to other livelihoods?                                                                  |                                                                                             |
| 2B           | Employment                          | What is the importance of fishing as a source of employment in the area?                                                              |                                                                                             |
| 2C           | Possibilities for living            | How does fishing affect living conditions in the area?                                                                                |                                                                                             |
| 2D           | Economic well-being                 | Has fishing increased the supply of services in the area? If yes, how?                                                                |                                                                                             |
| 3A           | The importance of community         | What local communities/businesses does fishing concretely affect, and how?                                                            |                                                                                             |
| 3B/C         | Differences of opinion              | Has fishing created conflicts within or between communities/businesses? If so, how/what are the main contradictions?                  |                                                                                             |
| 3D           | Indigenous peoples                  | How, if at all, has the status/rights of the Indigenous peoples/population been considered fairly in fishing-related decision-making? |                                                                                             |
| 4A           | Local identity                      | How does fishing mark the area's characteristics, culture or landscape?                                                               |                                                                                             |

|           |                                                                                          |                                                                                                                    |                                                                           |
|-----------|------------------------------------------------------------------------------------------|--------------------------------------------------------------------------------------------------------------------|---------------------------------------------------------------------------|
| <b>4B</b> | Traditional livelihoods                                                                  | How should traditional livelihoods be considered in area development, such as in connection with municipal zoning? |                                                                           |
| <b>5A</b> | The impact of decision-making on local livelihoods                                       | Do you think that the national level steering of fishing in the area works? If yes, how?                           |                                                                           |
| <b>5B</b> |                                                                                          | Do you think that the municipal level steering of fishing in the area works? If yes, how?                          |                                                                           |
| <b>5C</b> |                                                                                          |                                                                                                                    | What significance do these means of steering have for your way of living? |
| <b>5D</b> |                                                                                          | What steering mechanisms should be improved?                                                                       |                                                                           |
| <b>6A</b> | Individual's possibilities to participate in and influence decision-making and planning  |                                                                                                                    | How can you influence fishing-related decision-making and planning?       |
| <b>6B</b> | Community's possibilities to participate in and influence decision-making and planning   | How have the residents of the municipalities been consulted in planning and decision-making regarding fishing?     |                                                                           |
| <b>6C</b> | Stakeholders' possibilities to participate in and influence decision-making and planning | How have the stakeholders been consulted in planning and decision-making regarding fishing?                        |                                                                           |
| <b>6D</b> | Public discussion                                                                        | Do you think the public discussion about fishing in the area is just? If yes, how?                                 |                                                                           |
| <b>7A</b> | Quantity and quality of information                                                      | Whom do you contact to obtain information about fishing in the area?                                               |                                                                           |
| <b>7B</b> |                                                                                          | Do you think that clear and up-to-date information about fishing is available? If not, what is needed?             |                                                                           |
| <b>7C</b> | Reliability of information                                                               | Do you think the information you receive about fishing in the area is reliable? If not, why not?                   |                                                                           |

|            |                                                   |                                                                                                            |                                                                                   |
|------------|---------------------------------------------------|------------------------------------------------------------------------------------------------------------|-----------------------------------------------------------------------------------|
| <b>8A</b>  | Types of benefits                                 | What are the main fishing-related benefits for the local communities/area?                                 |                                                                                   |
| <b>8B</b>  | Types of impacts                                  | What are the main negative impacts of fishing on the local communities/area?                               |                                                                                   |
| <b>8C</b>  | Types of risks                                    | What are the risks to the local communities/area caused by fishing?                                        |                                                                                   |
| <b>8D</b>  | Distribution of benefits, risks and impacts/harms | Who gains the main benefits from fishing? Who bears the risks and negative impacts?                        |                                                                                   |
| <b>8E</b>  | Justice and fairness                              | Do you think the distribution of benefits, harms and risks is fair? If not, why not?                       |                                                                                   |
| <b>8F</b>  | Risk governance                                   | Should the state/municipality try to influence the distribution of benefits, harms and risks? If yes, how? |                                                                                   |
| <b>9A</b>  | Perceptions on fishing                            | What do you think about fishing in nature reserves/other ecologically valuable areas or in their vicinity? |                                                                                   |
| <b>10A</b> | Climate change                                    | What risks does climate change pose to fishing?                                                            |                                                                                   |
| <b>10B</b> | Ecosystem services                                |                                                                                                            | What natural resources other than fishing do the livelihoods in the area utilize? |
| <b>10C</b> | Environment                                       | How does fishing affect the use of the area's natural environment?                                         |                                                                                   |
| <b>11A</b> | Future planning                                   | How should fishing in the area be planned to benefit future generations?                                   |                                                                                   |
| <b>11B</b> | Meaning and value of fishing in the future        | As how relevant do you see fishing in the area in future?                                                  |                                                                                   |
